# Supplementary material for: Rab Geranylgeranyltransferase Subunit Beta as a Potential Indicator to Assess the Progression of Amyotrophic Lateral Sclerosis
Source: MDPI journal article supplement (doi:10.3390/brainsci13111531), 2023-10-30

# Rab Geranylgeranyltransferase Subunit Beta as a Potential Indicator to Assess the Progression of Amyotrophic Lateral Sclerosis

**Figure S1.** Correlation between Amyotrophic Lateral Sclerosis Functional Rating Scale–Revised (ALSFRS-R) score and BMI, serum CRP levels, disease duration, and serum IL-6 levels at diagnosis.

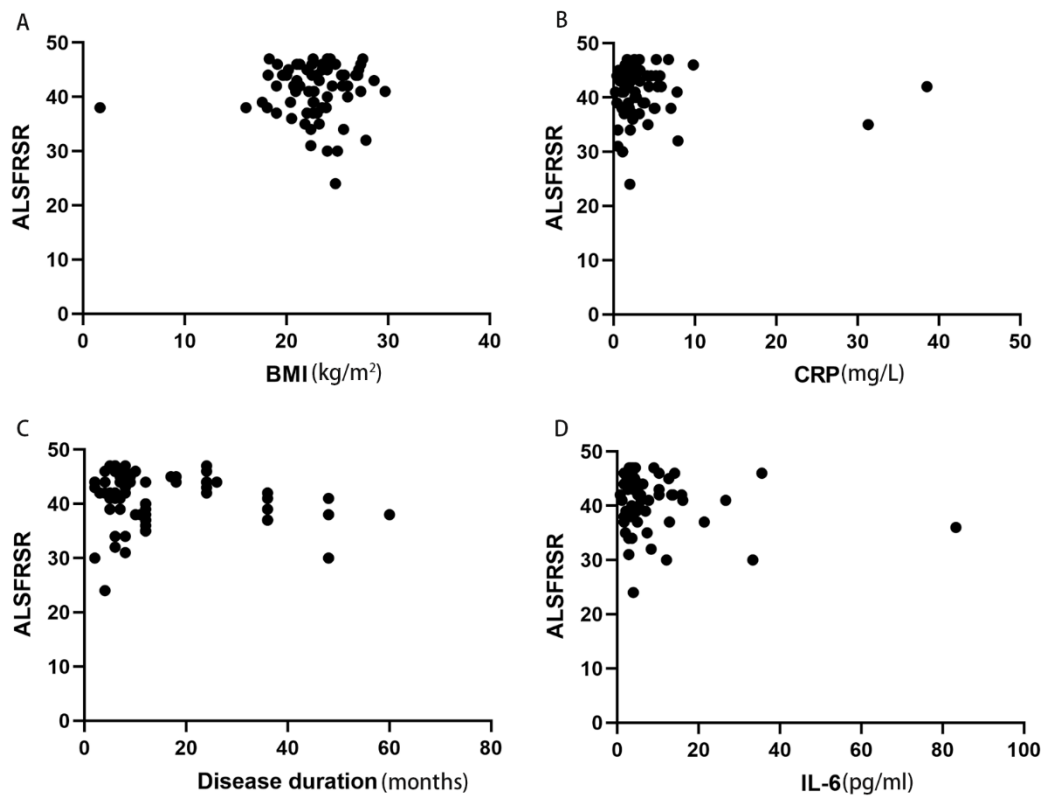

**Figure S2.** Correlation between progression rate (Delta-FS) of Amyotrophic Lateral Sclerosis and BMI, serum CRP levels, serum IL-6 levels, and age at diagnosis.

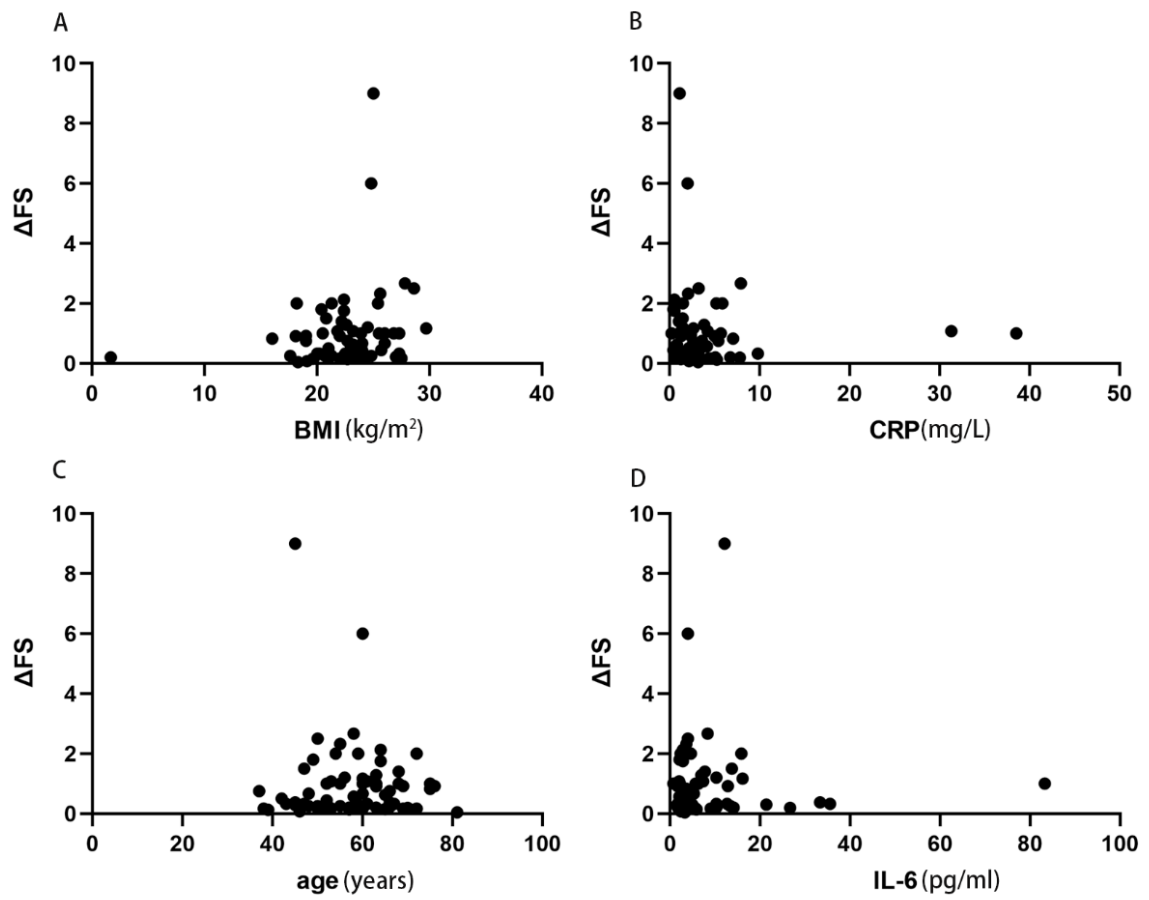

**Figure S3.** Correlation between Amyotrophic Lateral Sclerosis Functional Rating Scale–Revised (ALSFRS-R) score and BMI, serum CRP levels, disease duration, serum IL-6 levels, and age at diagnosis.

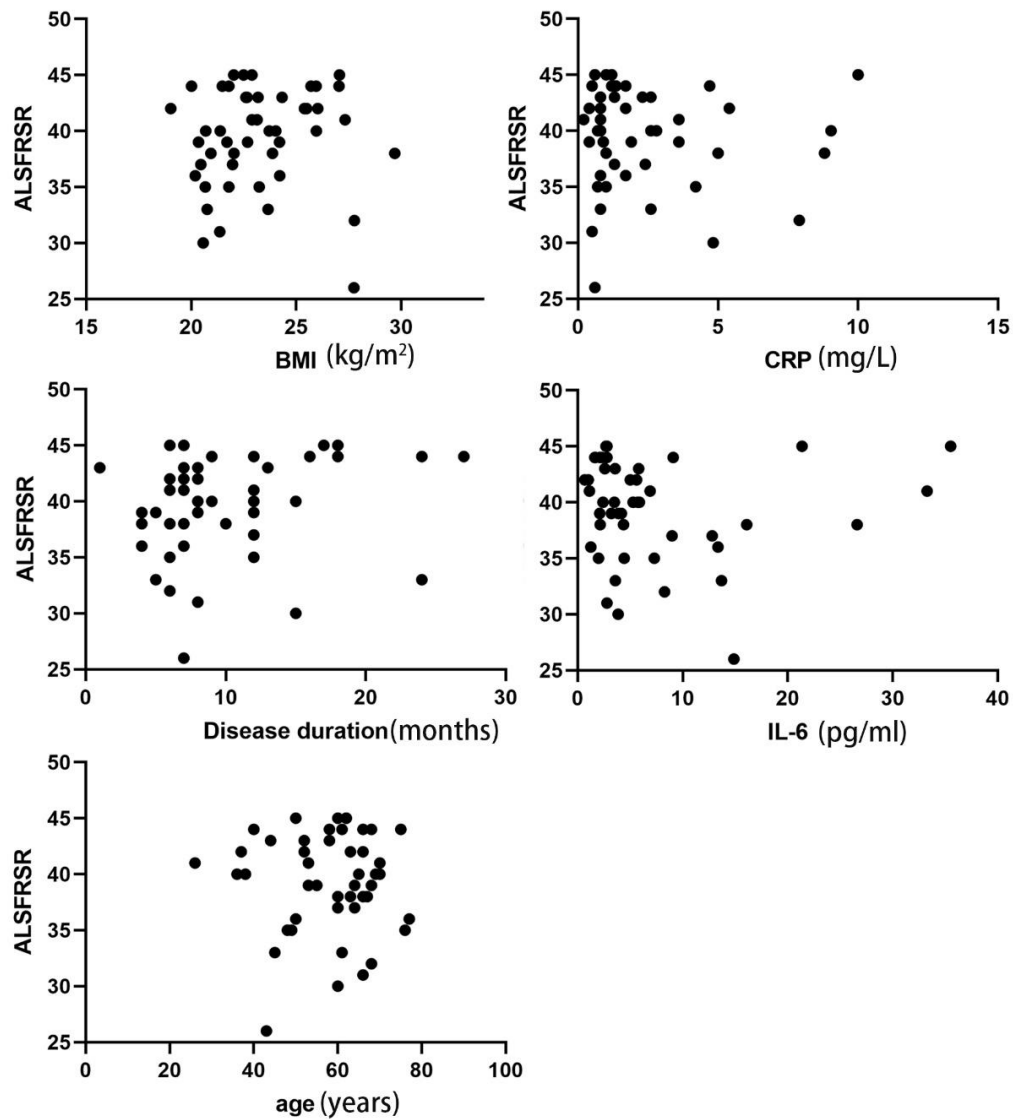

**Figure S4.** Correlation between progression rate (Delta-FS) of Amyotrophic Lateral Sclerosis and BMI, serum CRP levels, serum IL-6 levels, and age at diagnosis.

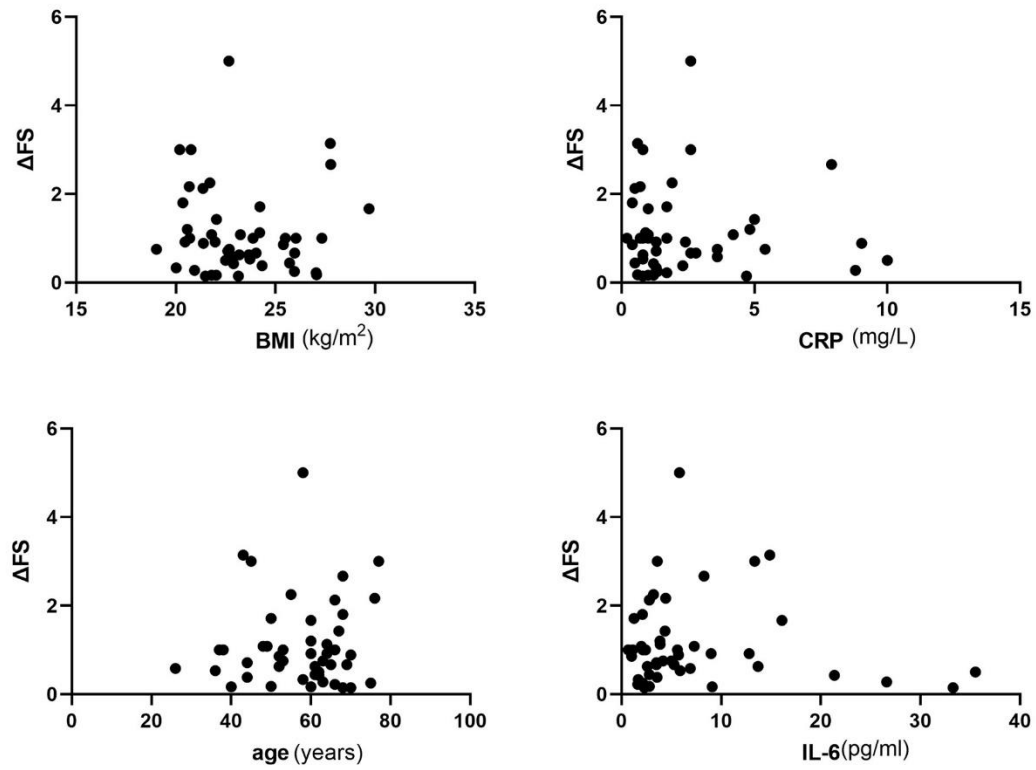

Supplement: s1 [file s1]
